# Supplementary material
Source: Royal Society of Chemistry journal article supplement (doi:10.1039/d6nj00702c)
Supplement: d6nj00702c1.pdf [file d6nj00702c1.pdf]

## SUPPORTING INFORMATION

### A smartphone-integrated colorimetric sensing platform for the detection of tannic acid in beverages using folic acid functionalized copper nanoclusters nanozyme.

Savarimuthu Monisha and Malaichamy Ilanchelian\*

Department of Chemistry

Bharathiar University, Coimbatore – 641046, Tamil Nadu, India.

Corresponding author E-mail: [cheliam73@yahoo.com](mailto:cheliam73@yahoo.com)

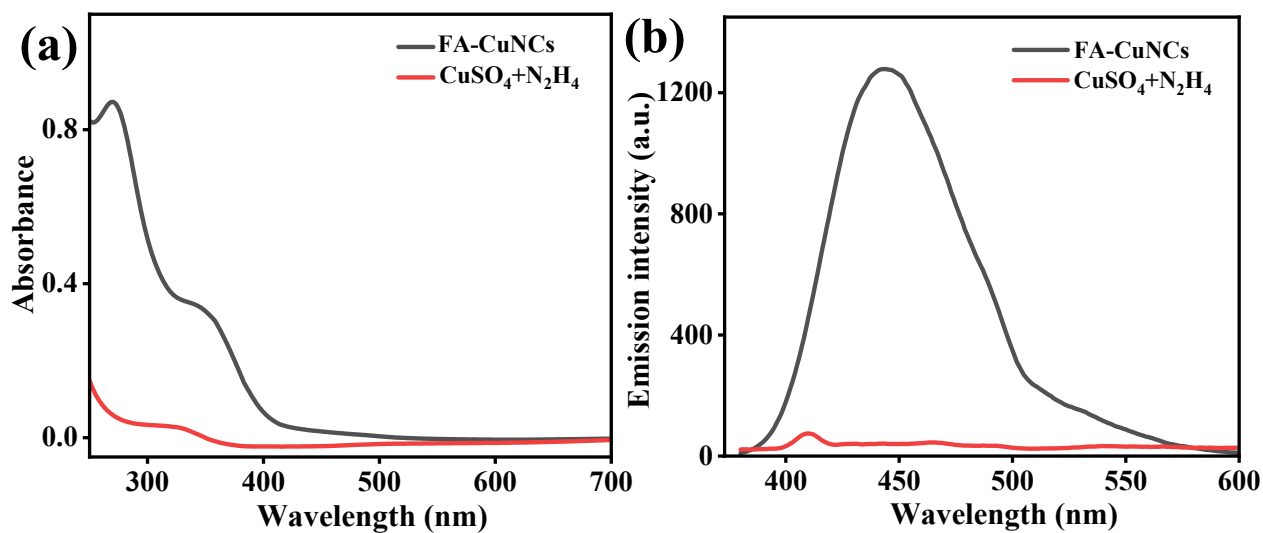

**Fig. S1** (a) UV-visible spectra of CuNCs in absence and presence of FA and (b) Emission spectra of CuNCs in the absence and presence of FA.

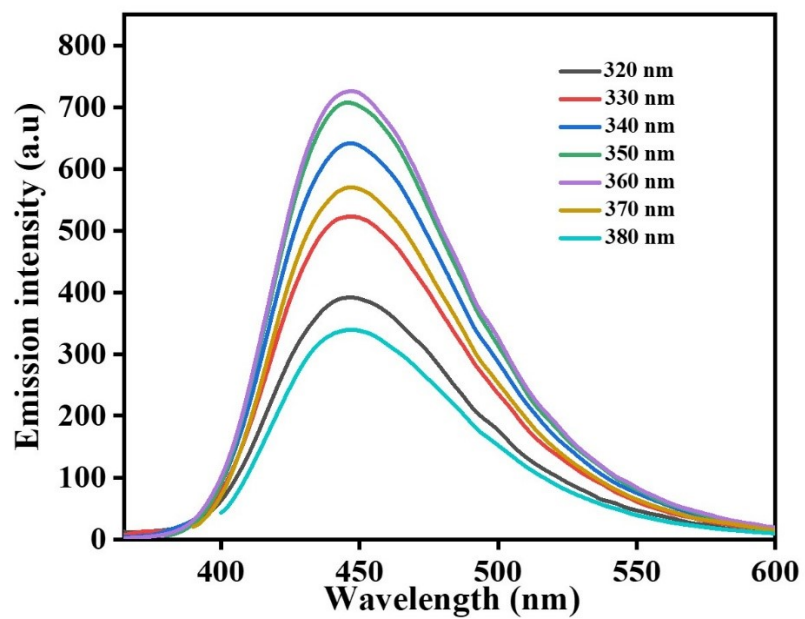

**Fig. S2.** Emission spectra of FA-CuNCs at different excitation wavelengths ( $\lambda_{\text{exi}} = 320, 330, 340, 350, 360, 370, 380$  nm).

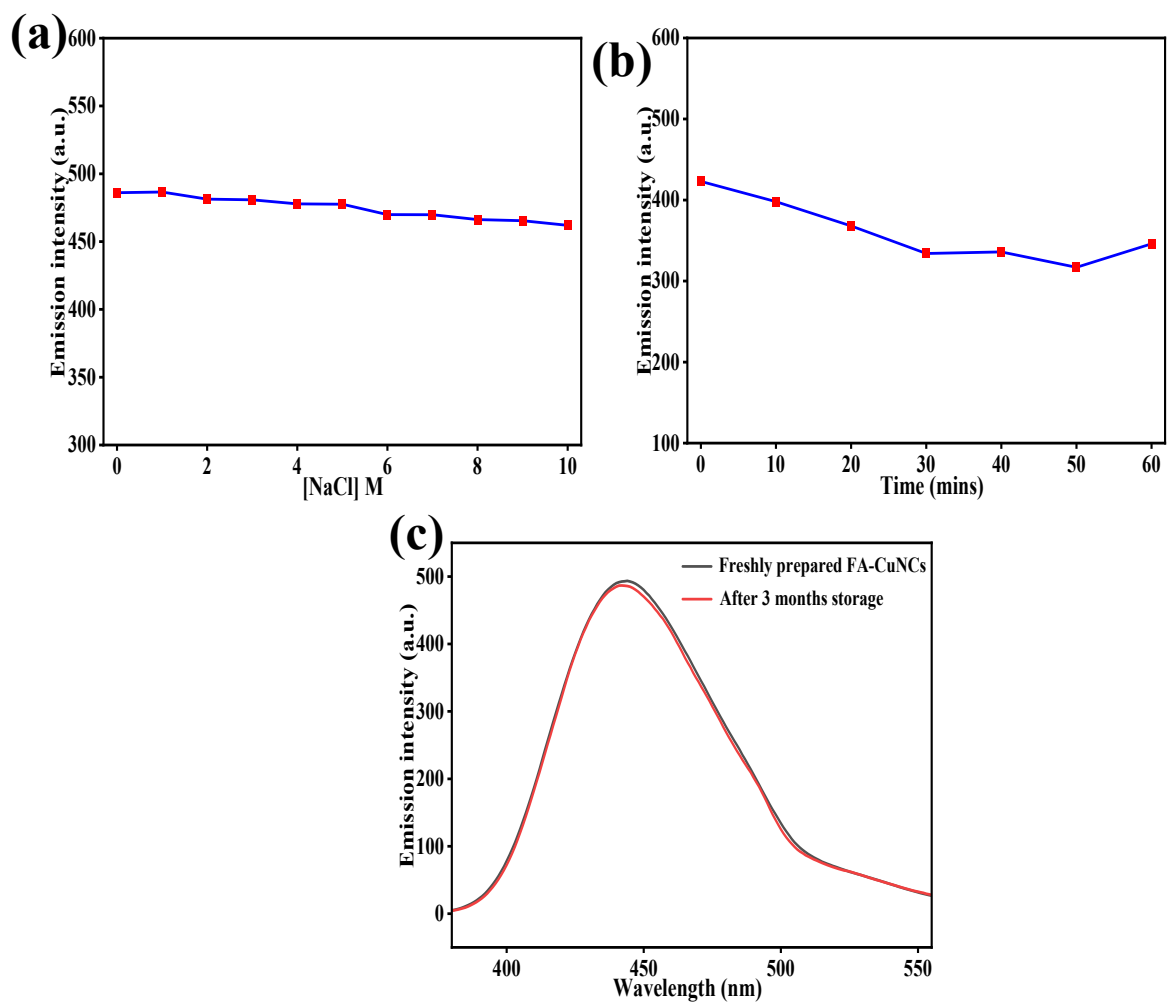

**Fig. S3.** Effect of FA-CuNCs upon (a) Different ionic strengths, (b) Different UV- irradiation time and (c) Storage.

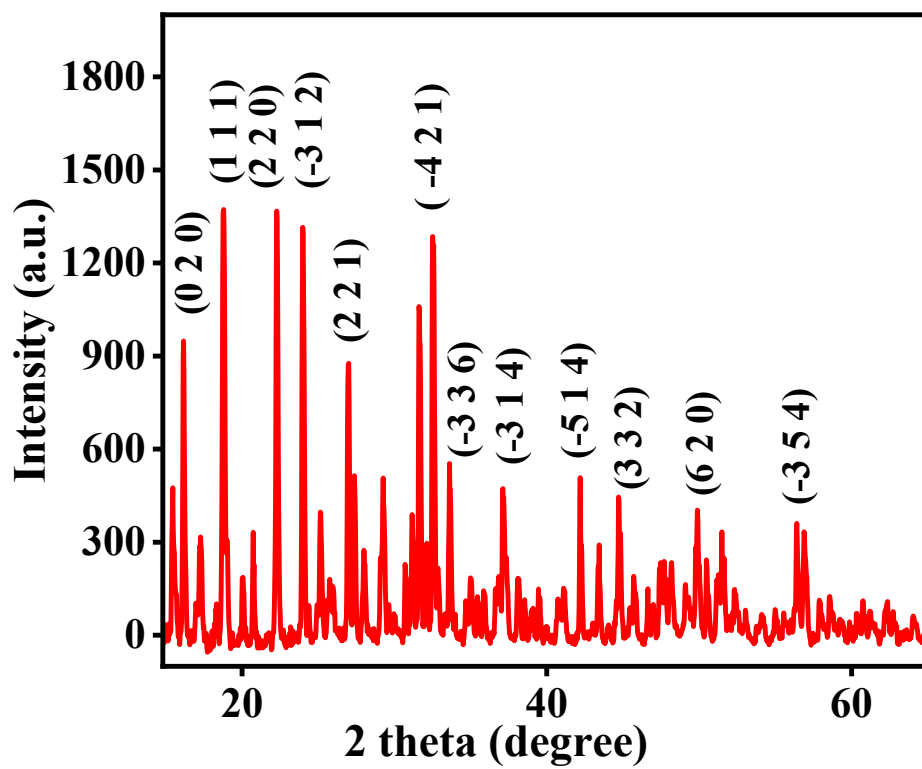

Fig. S4. XRD pattern of FA-CuNCs

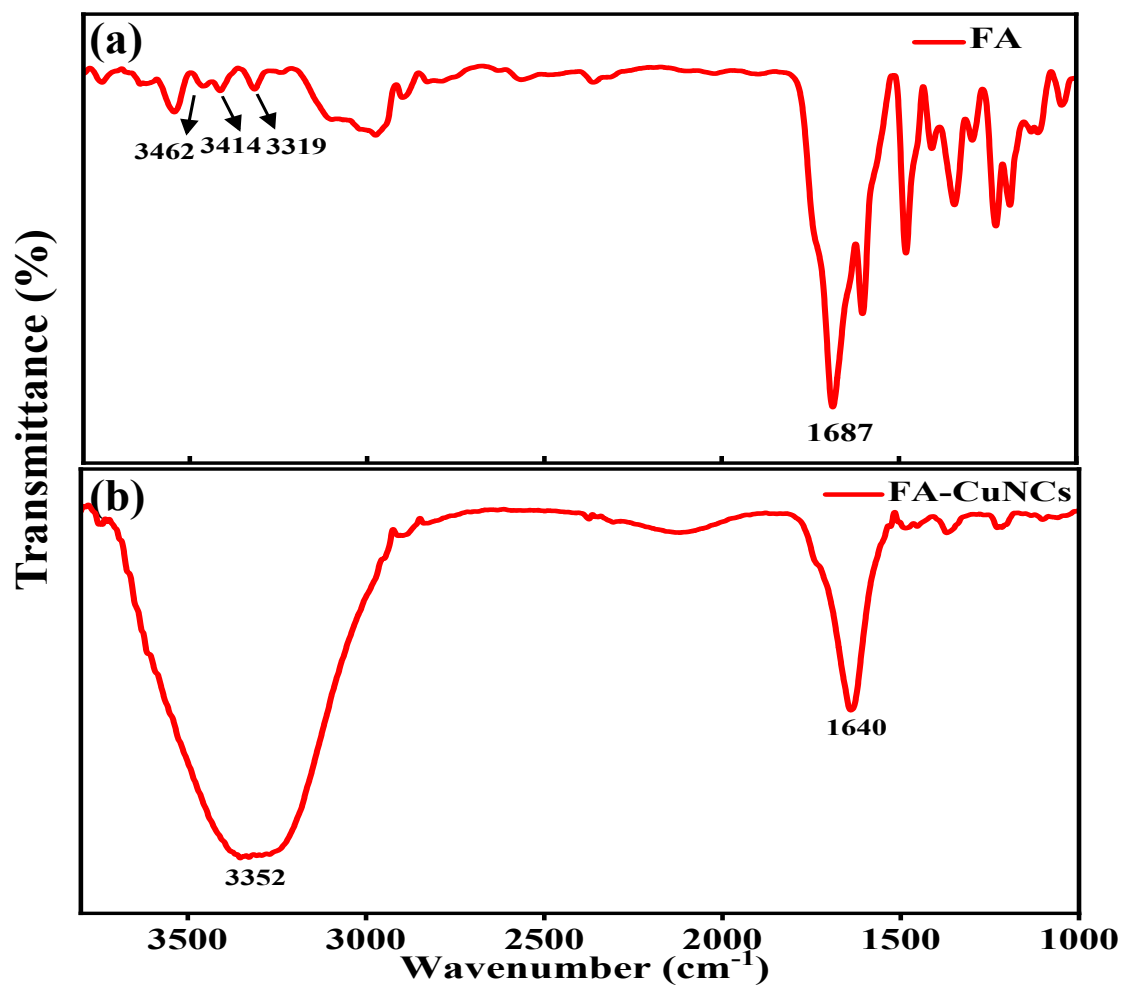

Fig. S5. FT-IR spectra of (a) FA and (b) FA-CuNCs.

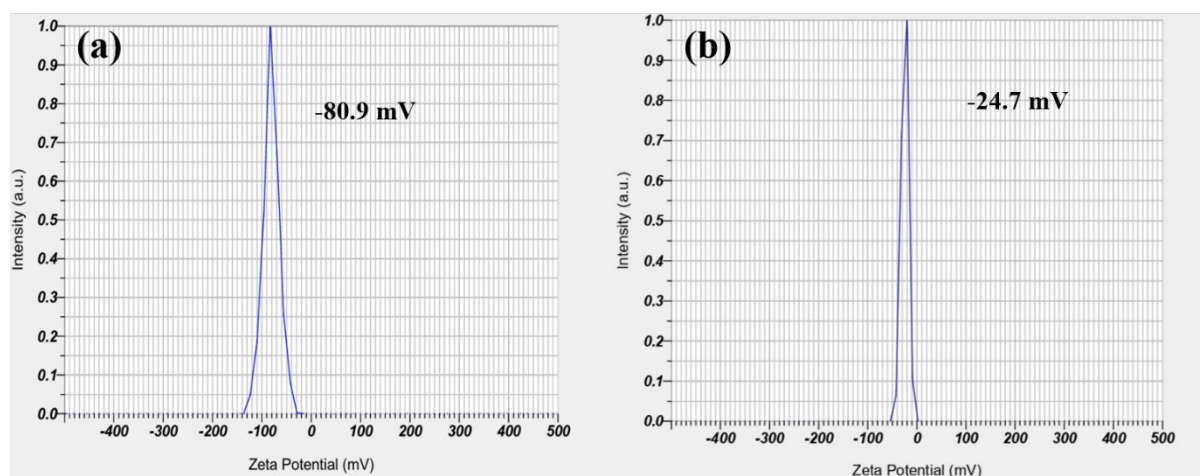

Fig. S6. Zeta-potential analysis of (a) FA and (b) FA-CuNCs.

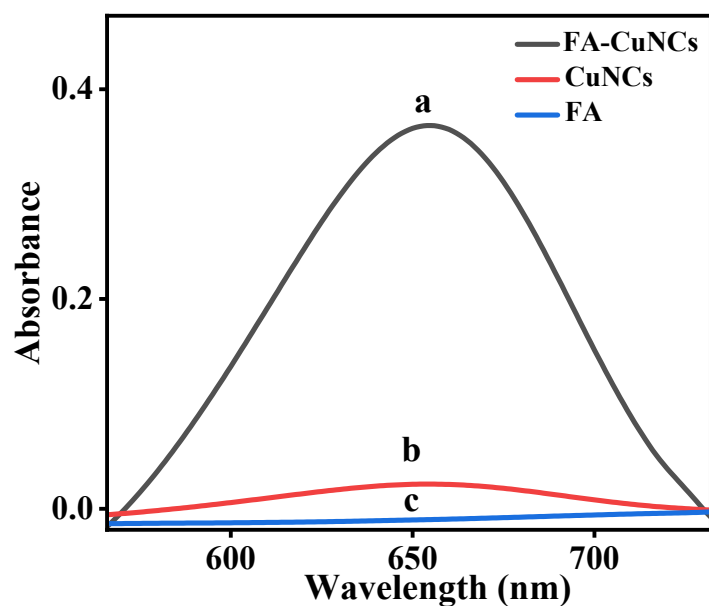

**Fig S7.** Peroxidase-like activity of (a) FA-CuNCs, (b) CuNCs and (c) FA.

**Table S1** Comparison of kinetic parameters of FA-CuNCs with other peroxidase-like nanomaterials.

| S.No      | Nanozymes                              | TMB           |                                                   | H <sub>2</sub> O <sub>2</sub> |                                                   | References          |
|-----------|----------------------------------------|---------------|---------------------------------------------------|-------------------------------|---------------------------------------------------|---------------------|
|           |                                        | $K_m$<br>(mM) | $V_{max}$<br>( $\times 10^{-8} \text{ Ms}^{-1}$ ) | $K_m$<br>(mM)                 | $V_{max}$<br>( $\times 10^{-8} \text{ Ms}^{-1}$ ) |                     |
| 1.        | Natural HRP                            | 0.43          | 10.00                                             | 3.70                          | 8.71                                              | 1                   |
| 2.        | CoTe <sub>2</sub>                      | 1.40          | 25.90                                             | 80.30                         | 21.00                                             | 2                   |
| 3.        | F-YbFe-PBA                             | 0.16          | 6.21                                              | 16.47                         | 9.60                                              | 3                   |
| 4.        | Os Ru NPs                              | 0.36          | 337.29                                            | 2.67                          | 208.37                                            | 4                   |
| 5.        | Cu-Ti <sub>3</sub> C <sub>2</sub> MQDs | 0.60          | 3.47                                              | 3.17                          | 27.57                                             | 5                   |
| <b>6.</b> | <b>FA-CuNCs</b>                        | <b>0.094</b>  | <b>0.49</b>                                       | <b>16.30</b>                  | <b>2.53</b>                                       | <b>Present work</b> |

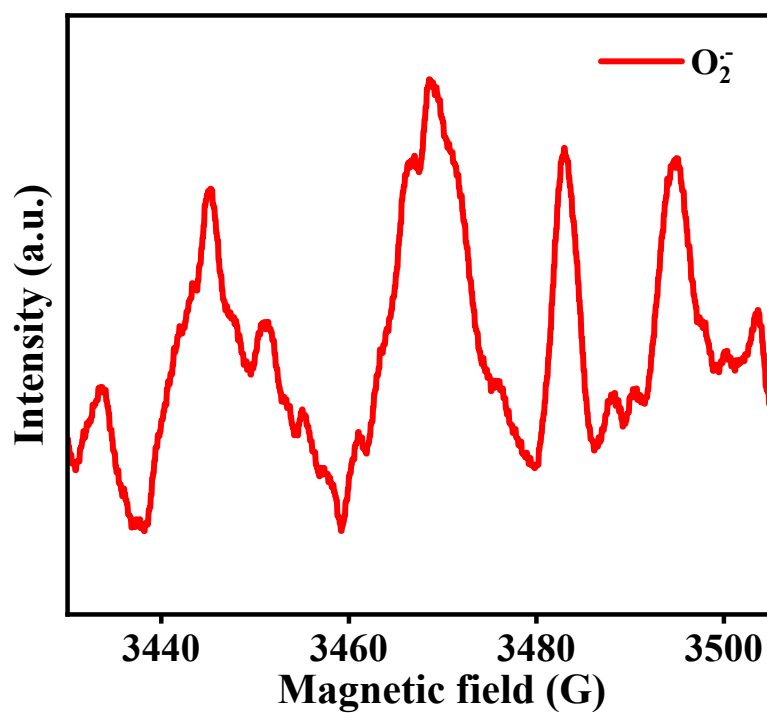

Fig. S8. ESR spectrum of  $O_2^-$  radicals produced by FA-CuNCs.

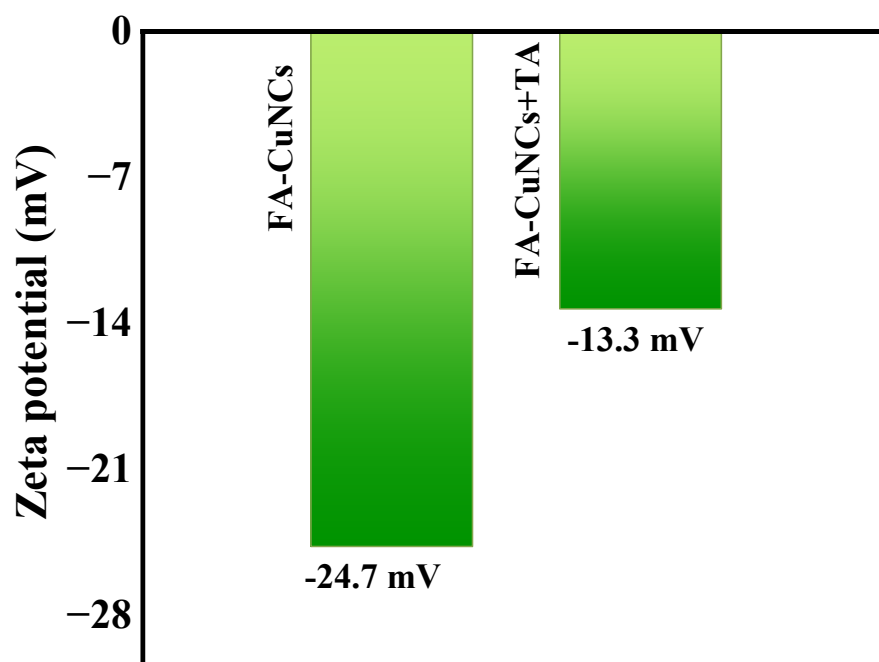

Fig. S9. Zeta potential of FA-CuNCs in the absence and presence of TA.

**Table S2.** Comparison between the performance of various nanomaterials reported as TA sensors.

| S.No      | Materials       | Methods             | Linear range ( $\mu\text{M}$ ) | LOD (nM)     | Reference           |
|-----------|-----------------|---------------------|--------------------------------|--------------|---------------------|
| 1.        | Fe-HHTP         | Colorimetric        | 0.50-100.00                    | 500.00       | 6                   |
| 2.        | Fe-N-C MFs      | Colorimetric        | 0.20-50.00                     | 150.00       | 7                   |
| 3.        | FeCe/NC         | Colorimetric        | 1.00-6.00                      | 260.00       | 8                   |
| 4.        | Au@CuO          | Colorimetric        | 0.30-2.40                      | 250.00       | 9                   |
| 5.        | AuBPs           | Colorimetric        | 1.25-37.50                     | 860.00       | 10                  |
| <b>6.</b> | <b>FA-CuNCs</b> | <b>Colorimetric</b> | <b>0.20-4.00</b>               | <b>88.50</b> | <b>Present work</b> |

## References

1. H. Shan, J. Shi, T. Chen, Y. Cao, Q. Yao, H. An, Z. Yang, Z. Wu, Z. Jiang, J. Xie, *ACS nano*, 2023, **17**(3), 2368-2377.
2. Z. Liu, H. Chen, X. Zheng, Y. Lv, F. Cheng, Y. Guo, *ACS ES&T Water*, 2026, **6**(2).
3. W. Wang, Y. Ren, B. Guan, H. Cao, W. Hu, L. Li, L. Guo, Y. Zeng, *Biosens. Bioelectron.*, 2025, **290**, 117997.
4. Y. Zhong, J. Yang, Q. Liang, X. Yu, H. Lai, Y. Lin, Q. Mo, Q. Wang, Z. Chen, H. Wang, *RSC Adv.*, 2025, **15**(37), 30446-30455.
5. S. Karimi, M. Amjadi, T. Hallaj, *J. Food Compos. Anal.*, 2025, **148**(4), 108621.
6. C. Wu, Z. Qin, Y. Liu, X. Qin, G. Liu, X. Wei, H. Zhang, *Lwt*, 2024, **197**, 115896.
7. X. Wu, Z. Wang, Y. Liu, D. Li, *Chem. Eng. J.*, 2023, **468**, 143638.
8. X. Zhu, C. Chen, D. Che, H. Yan, *Food Chem.X*, 2024, **23**, 101552.
9. X. Kang, Y. Ren, J. Wang, X. Zhu, N. Xin, F. Gao, D. Yu, *Analyst*, 2024, **149** (19), 4889-4898.
10. Y. Xue, X. Ma, X. Feng, S. Roberts, G. Zhu, Y. Huang, X. Fan, J. Fan, X. Chen, *ACS Appl. Nano Mater.*, 2023, **6**(13) 11572-11580.
